# Supplementary material for: Molecular Structure and Antioxidant Properties of Alkali Metal Salts of Rosmarinic Acid. Experimental and DFT Studies
Source: PubMed Central journal article supplement (PMC6680818; doi:10.3390/molecules24142645), 2019-07-21
Supplement: molecules-24-02645-s001.pdf [file molecules-24-02645-s001.pdf]

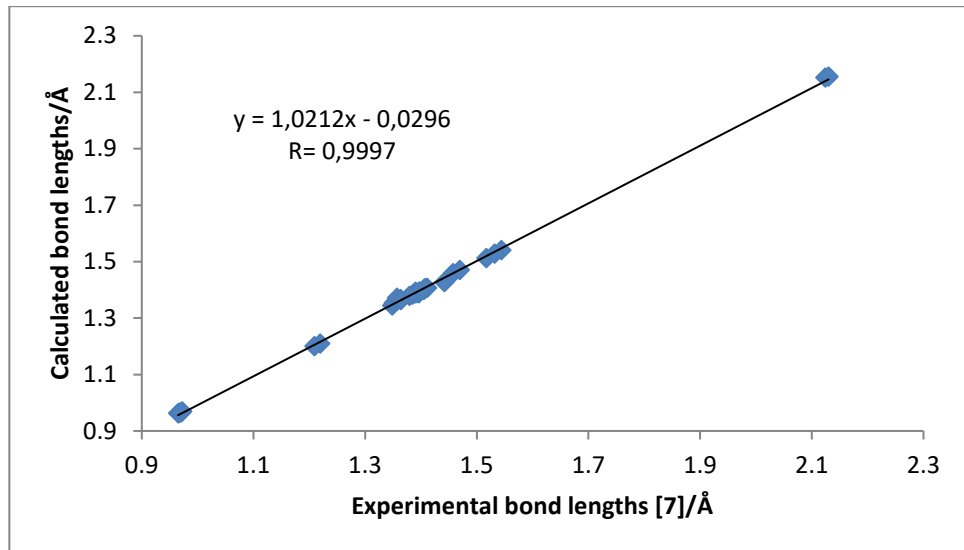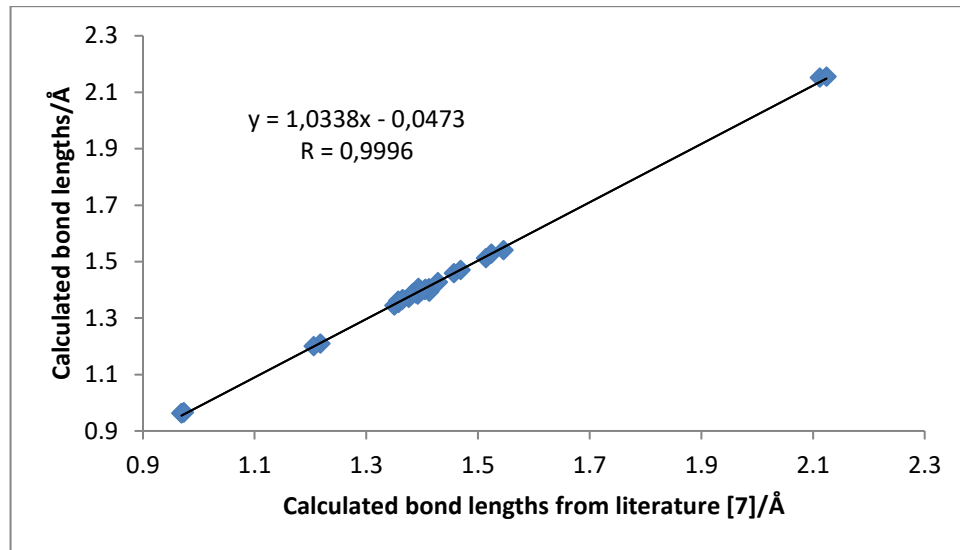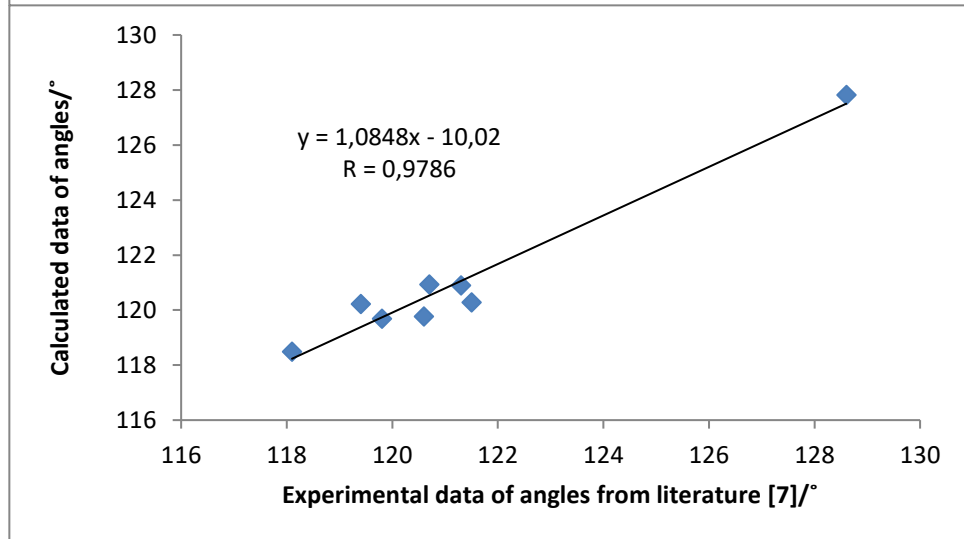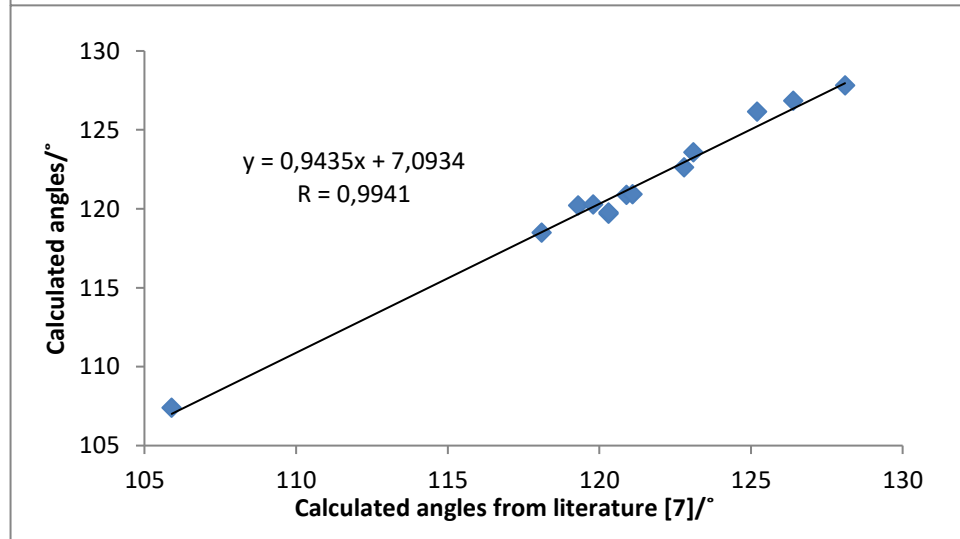

Figure S1. The correlation between calculated and literature data of bonds lengths and angles
